# Supplementary material for: Electronic nicotine delivery systems and/or electronic non-nicotine delivery systems for tobacco smoking cessation or reduction: a systematic review and meta-analysis
Source: PubMed Central journal article supplement — BMJ Open. 2017 Feb 23;7(2):e012680. doi: 10.1136/bmjopen-2016-012680 (PMC5337697; doi:10.1136/bmjopen-2016-012680), 2017-02-23
Supplement: bmjopen-2016-012680supp_table-1.pdf [file bmjopen-2016-012680supp_table-1.pdf]

**Appendix Table 1.** Search strategy

|    |                                                                                                                                                                                                                                                           |
|----|-----------------------------------------------------------------------------------------------------------------------------------------------------------------------------------------------------------------------------------------------------------|
| 1  | Electronic Cigarettes/                                                                                                                                                                                                                                    |
| 2  | e-cig*.mp.                                                                                                                                                                                                                                                |
| 3  | (electr* adj2 cig*).mp. [mp=title, abstract, original title, name of substance word, subject heading word, keyword heading word, protocol supplementary concept word, rare disease supplementary concept word, unique identifier]                         |
| 4  | (electronic adj2 nicotine).mp. [mp=title, abstract, original title, name of substance word, subject heading word, keyword heading word, protocol supplementary concept word, rare disease supplementary concept word, unique identifier]                  |
| 5  | (nicotine adj2 delivery).mp. [mp=title, abstract, original title, name of substance word, subject heading word, keyword heading word, protocol supplementary concept word, rare disease supplementary concept word, unique identifier]                    |
| 6  | (ENDS adj3 nicotine).mp. [mp=title, abstract, original title, name of substance word, subject heading word, keyword heading word, protocol supplementary concept word, rare disease supplementary concept word, unique identifier]                        |
| 7  | (vape or vaping).mp. [mp=title, abstract, original title, name of substance word, subject heading word, keyword heading word, protocol supplementary concept word, rare disease supplementary concept word, unique identifier]                            |
| 8  | or/1-7                                                                                                                                                                                                                                                    |
| 9  | "tobacco use"/ or smoking/                                                                                                                                                                                                                                |
| 10 | "tobacco use cessation"/ or smoking cessation/                                                                                                                                                                                                            |
| 11 | Tobacco/                                                                                                                                                                                                                                                  |
| 12 | Nicotine/                                                                                                                                                                                                                                                 |
| 13 | (smok\$ or cigar\$ or tobacco\$).mp. [mp=title, abstract, original title, name of substance word, subject heading word, keyword heading word, protocol supplementary concept word, rare disease supplementary concept word, unique identifier]            |
| 14 | ((quit\$ or stop\$ or ceas\$ or giv\$ or prevent\$) adj smok\$).mp.                                                                                                                                                                                       |
| 15 | or/9-14                                                                                                                                                                                                                                                   |
| 16 | (electronic or electric or vapor or vapour).mp. [mp=title, abstract, original title, name of substance word, subject heading word, keyword heading word, protocol supplementary concept word, rare disease supplementary concept word, unique identifier] |
| 17 | 15 and 16                                                                                                                                                                                                                                                 |
| 18 | 8 or 17                                                                                                                                                                                                                                                   |
| 19 | Epidemiologic Studies/                                                                                                                                                                                                                                    |
| 20 | exp Case-Control Studies/                                                                                                                                                                                                                                 |
| 21 | exp Cohort Studies/                                                                                                                                                                                                                                       |
| 22 | Case control.tw.                                                                                                                                                                                                                                          |
| 23 | (cohort adj (study or studies)).tw.                                                                                                                                                                                                                       |
| 24 | Cohort analy\$.tw.                                                                                                                                                                                                                                        |
| 25 | (Follow up adj (study or studies)).tw.                                                                                                                                                                                                                    |

|    |                                                                   |
|----|-------------------------------------------------------------------|
| 26 | (observational adj (study or studies)).tw.                        |
| 27 | Longitudinal.tw.                                                  |
| 28 | Retrospective.tw.                                                 |
| 29 | Cross sectional.tw.                                               |
| 30 | Cross-sectional studies/                                          |
| 31 | or/19-30                                                          |
| 32 | 18 and 31                                                         |
| 33 | randomized controlled trial.pt.                                   |
| 34 | controlled clinical trial.pt.                                     |
| 35 | randomized.ab.                                                    |
| 36 | placebo.ab.                                                       |
| 37 | drug therapy.fs.                                                  |
| 38 | randomly.ab.                                                      |
| 39 | trial.ab.                                                         |
| 40 | groups.ab.                                                        |
| 41 | or/33-40                                                          |
| 42 | exp animals/ not humans.sh.                                       |
| 43 | 41 not 42                                                         |
| 44 | clinical trial.mp. or clinical trial.pt. or random:.mp. or tu.xs. |
| 45 | randomized controlled trial.pt. or placebo.mp.                    |
| 46 | 44 or 45                                                          |
| 47 | 18 and 43                                                         |
| 48 | 18 and 46                                                         |
| 49 | 32 or 47 or 48                                                    |
