# Supplementary material for: Electronic nicotine delivery systems and/or electronic non-nicotine delivery systems for tobacco smoking cessation or reduction: a systematic review and meta-analysis
Source: PubMed Central journal article supplement — BMJ Open. 2017 Feb 23;7(2):e012680. doi: 10.1136/bmjopen-2016-012680 (PMC5337697; doi:10.1136/bmjopen-2016-012680), 2017-02-23
Supplement: bmjopen-2016-012680supp_table-2.pdf [file bmjopen-2016-012680supp_table-2.pdf]

**Appendix Table 2.** Information about contact with the authors of the included studies.

| <b>Author, year</b>          | <b>E-mail sent by the reviewers</b> | <b>Did the author of the study reply?</b> | <b>Did the author provide the requested data?</b>                     |
|------------------------------|-------------------------------------|-------------------------------------------|-----------------------------------------------------------------------|
| <b>Adriaens, 2014 [33]</b>   | <b>Yes</b>                          | <b>Yes</b>                                | <b>Yes</b>                                                            |
| <b>Bullen, 2013 [34-39]</b>  | <b>Yes</b>                          | <b>Yes</b>                                | <b>Yes</b>                                                            |
| <b>Caponnetto, 2013 [25]</b> | <b>Yes</b>                          | <b>Yes</b>                                | <b>No (however author replied stating that will contact us later)</b> |
| <b>Al-Delaimy, 2015 [40]</b> | <b>Yes</b>                          | <b>Yes</b>                                | <b>Yes</b>                                                            |
| <b>Biener, 2015 [29]</b>     | <b>Yes</b>                          | <b>Yes</b>                                | <b>Yes</b>                                                            |
| <b>Brose, 2015 [26-28]</b>   | <b>Yes</b>                          | <b>Yes</b>                                | <b>Yes</b>                                                            |
| <b>Hajek, 2015 [46]</b>      | <b>Yes</b>                          | <b>No</b>                                 | <b>No</b>                                                             |
| <b>Harrington, 2015 [45]</b> | <b>Yes</b>                          | <b>Yes</b>                                | <b>Yes</b>                                                            |
| <b>Manzoli, 2015 [42]</b>    | <b>Yes</b>                          | <b>Yes</b>                                | <b>No (however author replied stating that will contact us later)</b> |
| <b>Borderud, 2014 [41]</b>   | <b>Yes</b>                          | <b>Yes</b>                                | <b>Yes</b>                                                            |
| <b>Prochaska, 2014 [43]</b>  | <b>Yes</b>                          | <b>Yes</b>                                | <b>Yes</b>                                                            |
| <b>Vickerman, 2013 [44]</b>  | <b>Yes</b>                          | <b>Yes</b>                                | <b>Yes</b>                                                            |
