# Supplementary material for: Electronic nicotine delivery systems and/or electronic non-nicotine delivery systems for tobacco smoking cessation or reduction: a systematic review and meta-analysis
Source: PubMed Central journal article supplement — BMJ Open. 2017 Feb 23;7(2):e012680. doi: 10.1136/bmjopen-2016-012680 (PMC5337697; doi:10.1136/bmjopen-2016-012680), 2017-02-23
Supplement: bmjopen-2016-012680supp_table-3.pdf [file bmjopen-2016-012680supp_table-3.pdf]

**Appendix Table 3.** Characteristics of e-cigarettes from the included studies.

| Study                        | Device                                                               |                     |                                     |                             | Nicotine concentration                                                  | Eliquid<br>Flavors in the eliquid                                 | Conveyants                                          | Use                                                                                              |                         |
|------------------------------|----------------------------------------------------------------------|---------------------|-------------------------------------|-----------------------------|-------------------------------------------------------------------------|-------------------------------------------------------------------|-----------------------------------------------------|--------------------------------------------------------------------------------------------------|-------------------------|
|                              | Type                                                                 | Brand and model     | Battery voltage                     | Metal in heating resistance |                                                                         |                                                                   |                                                     | Puff regime during study                                                                         | Amount eliquid consumed |
| <b>Adriaens, 2014 [33]</b>   | Not a cigalike (tank-type atomizer) (second generation ENDS devices) | Joyetech eGo-C      | 3.3 V, 1000 mAh lithium-ion battery | 2.2-ohm atomizer head       | 18mg of nicotine per mL for both types                                  | Tobacco-flavored (Dekang “Turkish Blend”) for both types          | Not reported                                        | Not reported                                                                                     | Not reported            |
|                              |                                                                      | Kanger T2-CC        | 3.7 V, 650 mAh lithium-ion battery  | 2.5-ohm coil                |                                                                         |                                                                   |                                                     |                                                                                                  |                         |
| <b>Bullen, 2013 [34-39]</b>  | Cigalike                                                             | Elusion             | Not reported                        | Not reported                | Labelled 16mg (commissioned analyses showed 10-16mg of nicotine per mL) | Not reported                                                      | Not reported                                        | Participants used e-cig as desired from 1 week before until 12 weeks after their chosen quit day | Not reported            |
| <b>Caponnetto, 2013 [25]</b> | Cigalike                                                             | Categoria model 401 | 3.7 V, 90 mAh lithium-ion battery   | Not reported                | Cartridges of 7.2mg and 5.4mg nicotine                                  | Cartridge without nicotine (control group): “sweet tobacco” aroma | Solution of propylene glycol and vegetable glycerin | Not reported                                                                                     | Not reported            |
| <b>Al-Delaimy, 2015 [40]</b> | Not reported                                                         | Not reported        | Not reported                        | Not reported                | Not reported                                                            | Not reported                                                      | Not reported                                        | Not reported                                                                                     | Not reported            |
| <b>Biener, 2015 [29]</b>     | Not reported                                                         | Not reported        | Not reported                        | Not reported                | Not reported                                                            | Not reported                                                      | Not reported                                        | Not reported                                                                                     | Not reported            |
| <b>Brose, 2015 [26-28]</b>   | 76.3% used Cigalike                                                  | Not reported        | Not reported                        | Not reported                | Not reported                                                            | Not reported                                                      | Not reported                                        | Not reported                                                                                     | Not reported            |
|                              | 23.7% used Tank                                                      |                     |                                     |                             |                                                                         |                                                                   |                                                     |                                                                                                  |                         |
