# Supplementary figures and images for: Electronic nicotine delivery systems and/or electronic non-nicotine delivery systems for tobacco smoking cessation or reduction: a systematic review and meta-analysis
Source: PubMed Central journal article supplement — BMJ Open. 2017 Feb 23;7(2):e012680. doi: 10.1136/bmjopen-2016-012680 (PMC5337697; doi:10.1136/bmjopen-2016-012680), 2017-02-23

Appendix Figure 1

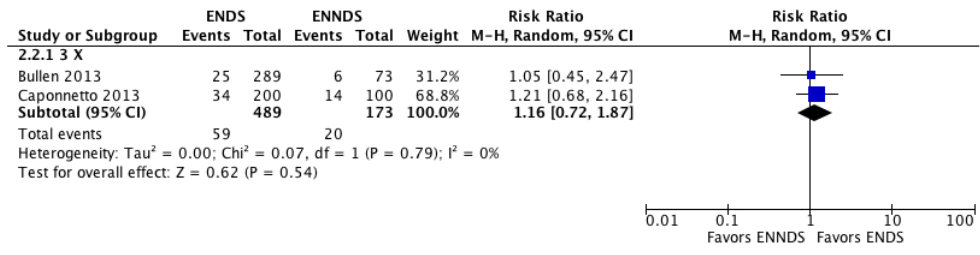

Appendix Figure 2

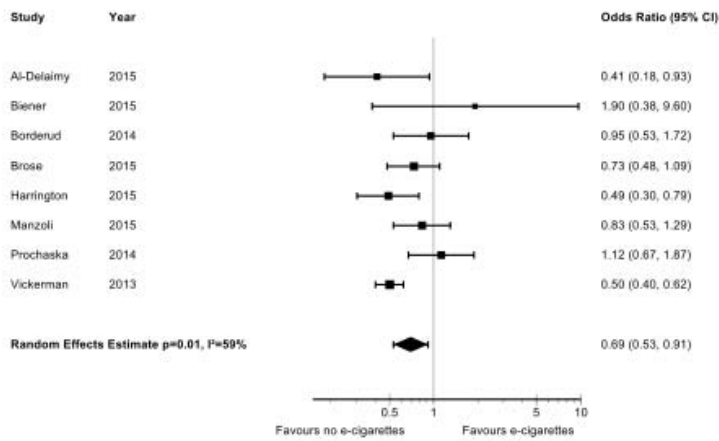

Appendix Figure 3

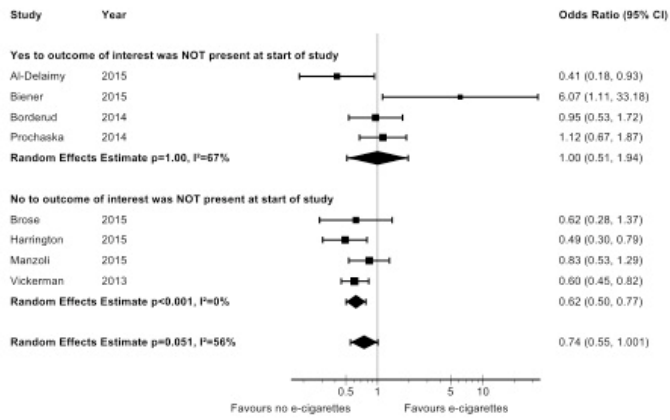

Appendix Figure 4

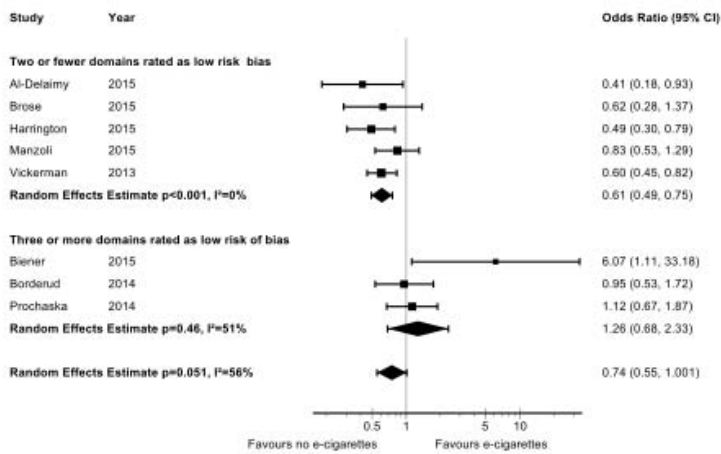

Appendix Figure 5

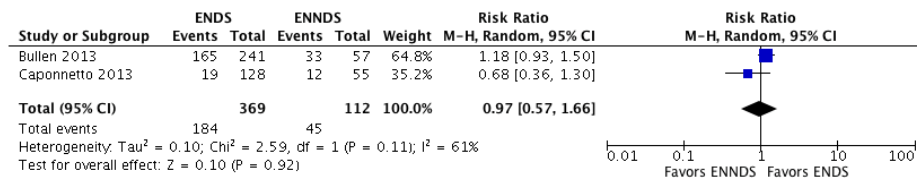

Supplement: bmjopen-2016-012680supp_figures.pdf [file bmjopen-2016-012680supp_figures.pdf]
